# Supplementary material for: Molecular titanium nitrides: nucleophiles unleashed
Source: PubMed Central journal article supplement (PMC5369542; doi:10.1039/c6sc03422e), 2016-09-22
Supplement: SC-008-C6SC03422E-s001.pdf [file SC-008-C6SC03422E-s001.pdf]

**Supporting Information for:  
Molecular Titanium Nitrides: Nucleophiles Unleashed**

Lauren N. Grant,<sup>§</sup> Balazs Pinter,<sup>†</sup> Takashi Kurogi,<sup>§</sup> Maria E. Carroll,<sup>§</sup> Gang Wu,<sup>‡</sup> Brian C. Manor,<sup>§</sup> Patrick J. Carroll<sup>§</sup> and Daniel J. Mindiola<sup>§,\*</sup>

<sup>§</sup>*Department of Chemistry, University of Pennsylvania, 231 South 34th Street, Philadelphia PA, 19104.*

<sup>†</sup>*Eenheid Algemene Chemie (ALGC), Vrije Universiteit Brussel (VUB), Pleinlaan 2, 1050, Brussels (Belgium).*

<sup>‡</sup>*Department of Chemistry, Queen's University, Kingston, Ontario, Canada K7L 3N6.*

Corresponding author: E-mail, [mindiola@sas.upenn.edu](mailto:mindiola@sas.upenn.edu)

**Table of Contents**

|                                            |         |
|--------------------------------------------|---------|
| A. NMR Data                                | S2-S9   |
| B. Phosphonylimide LT NMR experiments      | S10-S11 |
| C. Computational Details                   | S11-S17 |
| D. Crystallography Details                 | S16-S17 |
| E. Solid state <sup>15</sup> N NMR Details | S18     |
| F. References                              | S19-S20 |

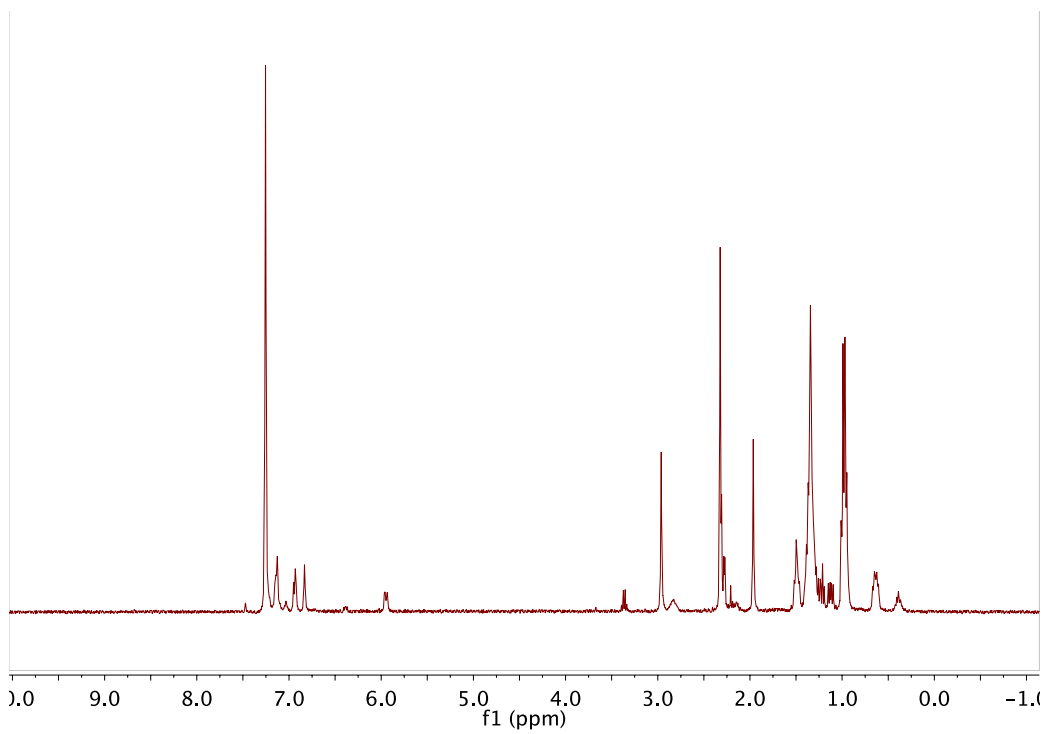

**Figure S1:**  $^1\text{H}$  NMR Spectrum of **2** in  $\text{C}_6\text{D}_6$ , 400 MHz, 300K

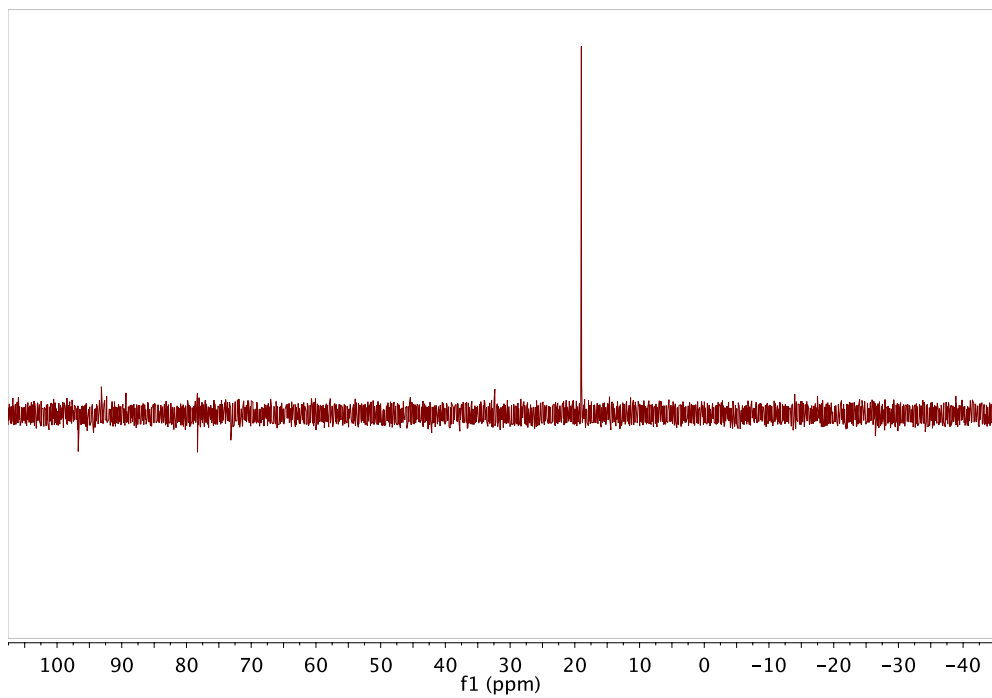

**Figure S2:**  $^{31}\text{P}\{^1\text{H}\}$  NMR Spectrum of **2** in  $\text{C}_6\text{D}_6$ , 162 MHz, 300K

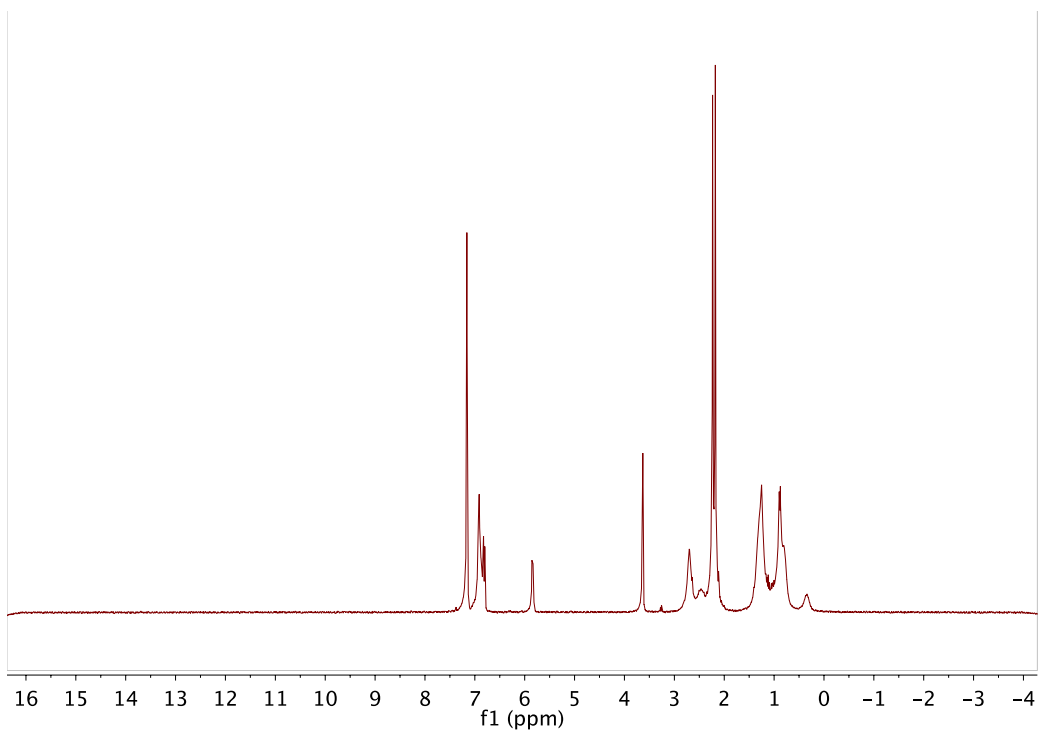

**Figure S3:**  $^1\text{H}$  NMR Spectrum of **3** in  $\text{C}_6\text{D}_6$ , 400 MHz, 300K

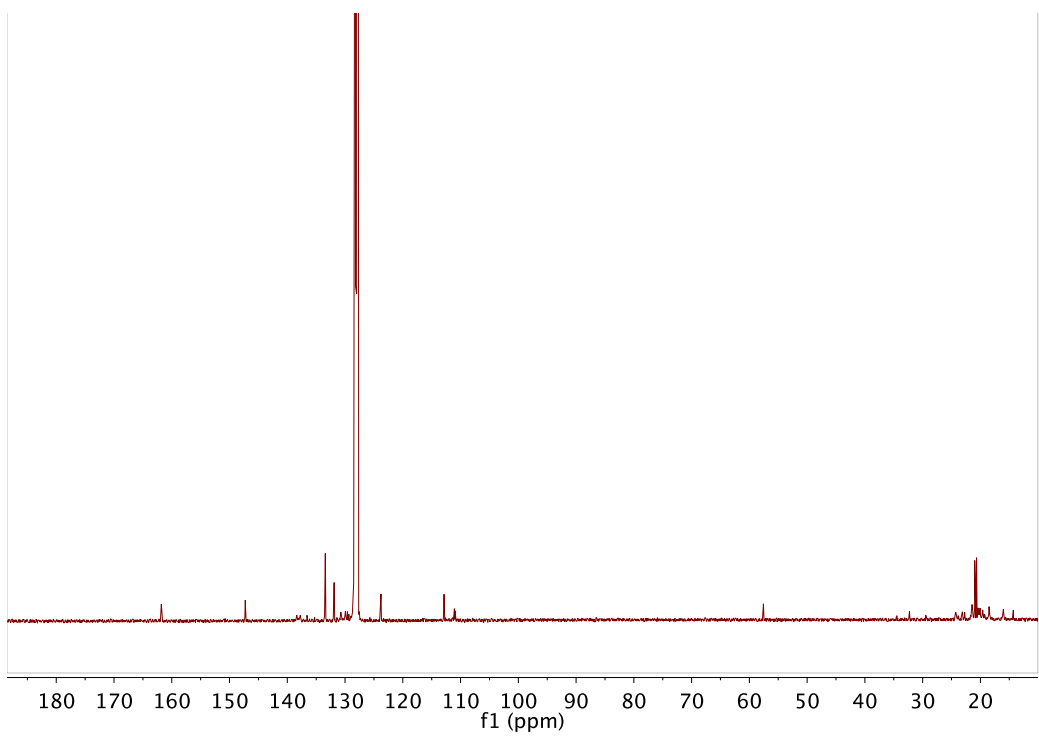

**Figure S4:**  $^{13}\text{C}\{^1\text{H}\}$  NMR Spectrum of **3** in  $\text{C}_6\text{D}_6$ , 125.8 MHz, 300K

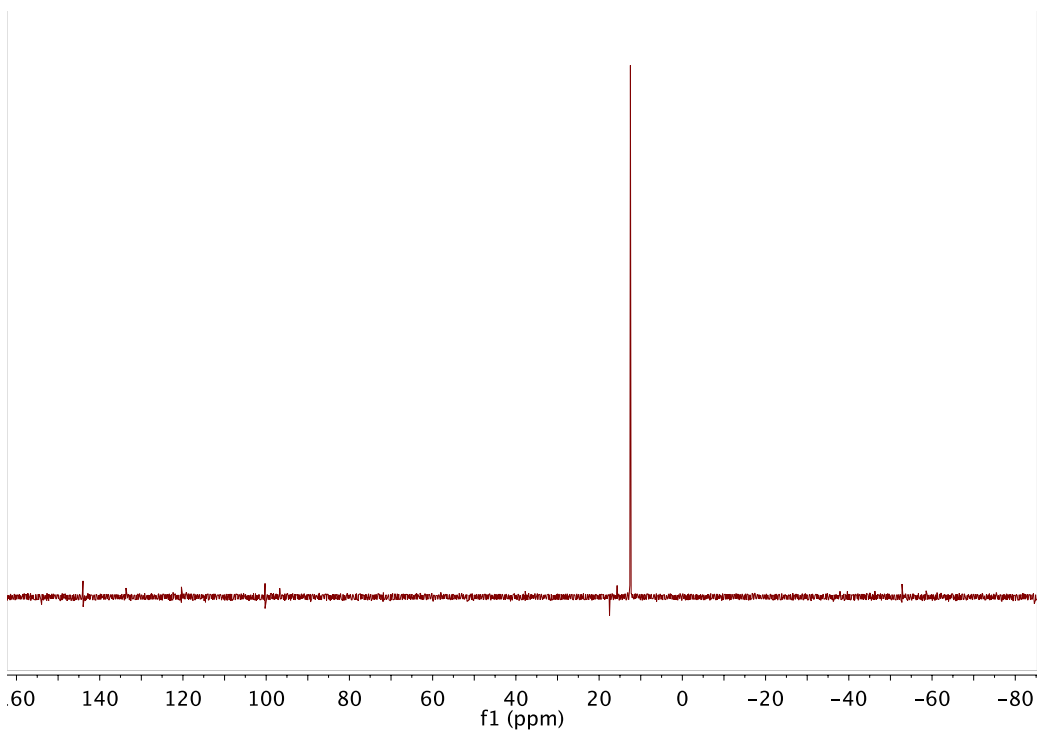

**Figure S5:**  $^{31}\text{P}\{^1\text{H}\}$  NMR Spectrum of **3** in  $\text{C}_6\text{D}_6$ , 162 MHz, 300K

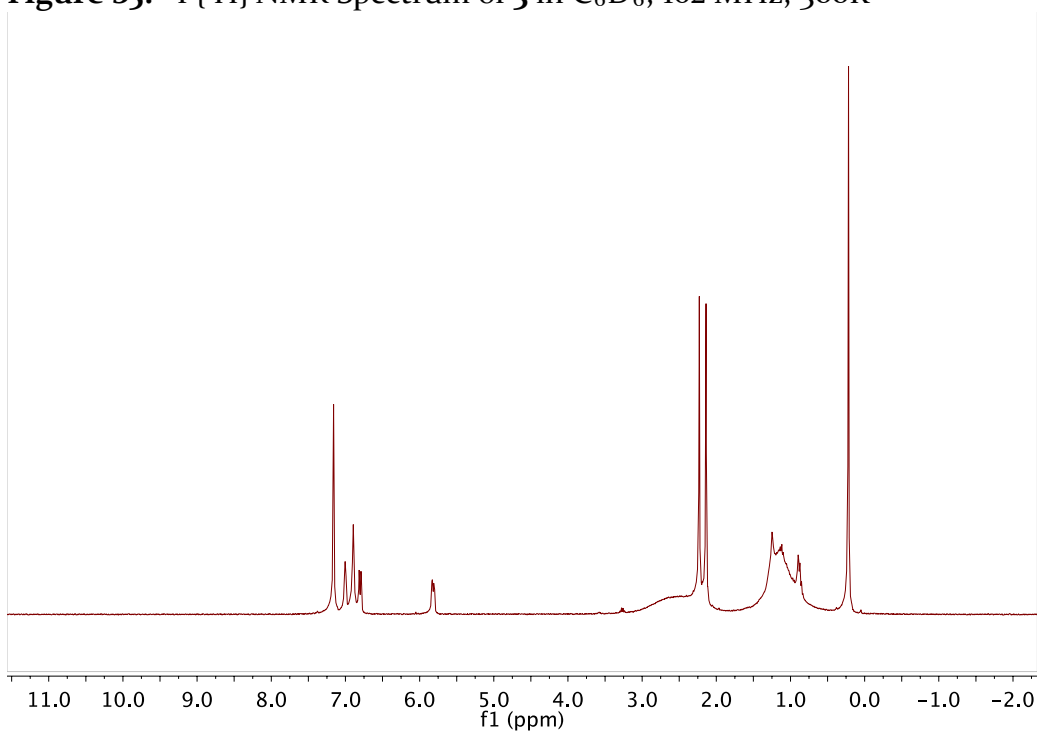

**Figure S6:**  $^1\text{H}$  NMR Spectrum of **4** in  $\text{C}_6\text{D}_6$ , 400 MHz, 300K

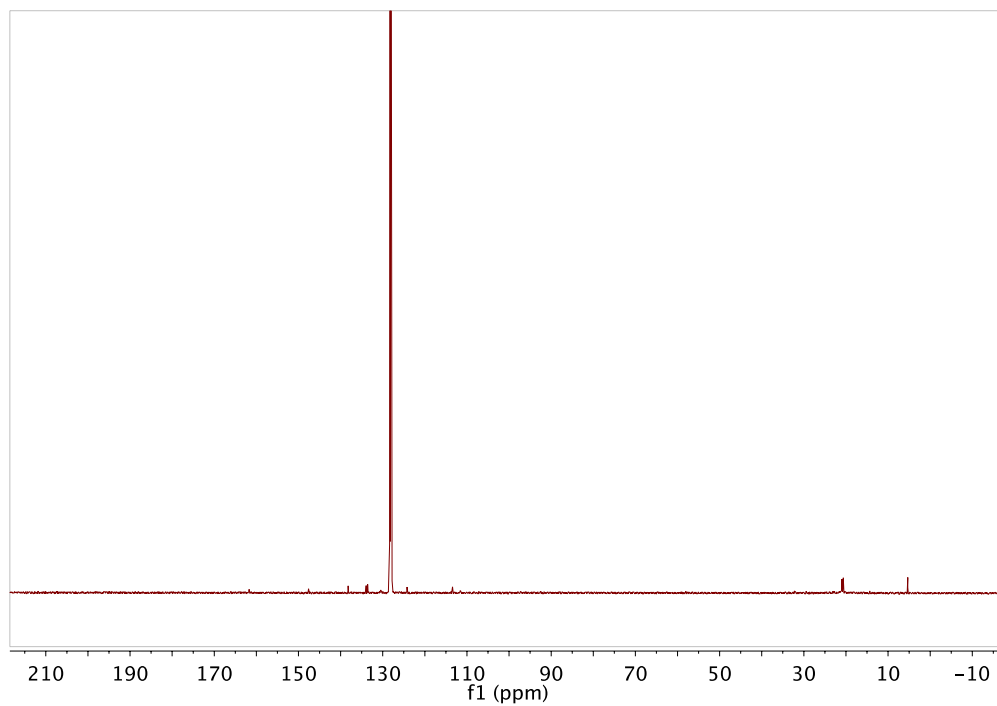

**Figure S7:**  $^{13}\text{C}\{^1\text{H}\}$  NMR Spectrum of **4** in  $\text{C}_6\text{D}_6$ , 125.8 MHz, 300K

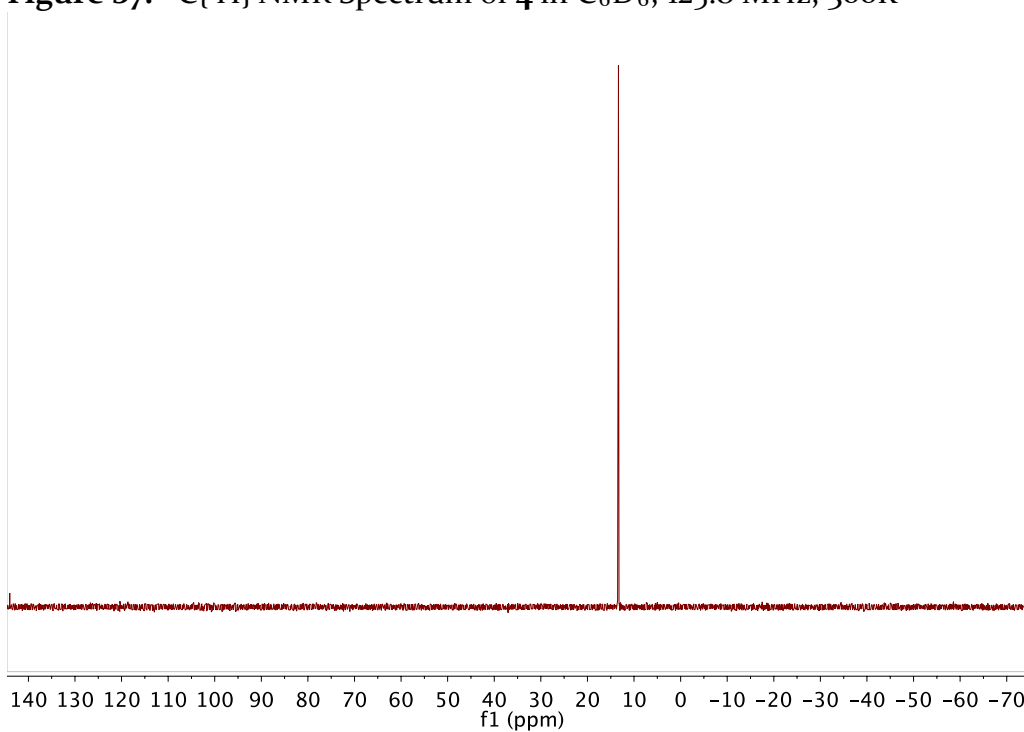

**Figure S8:**  $^{31}\text{P}\{^1\text{H}\}$  NMR Spectrum of **4** in  $\text{C}_6\text{D}_6$ , 162 MHz, 300K

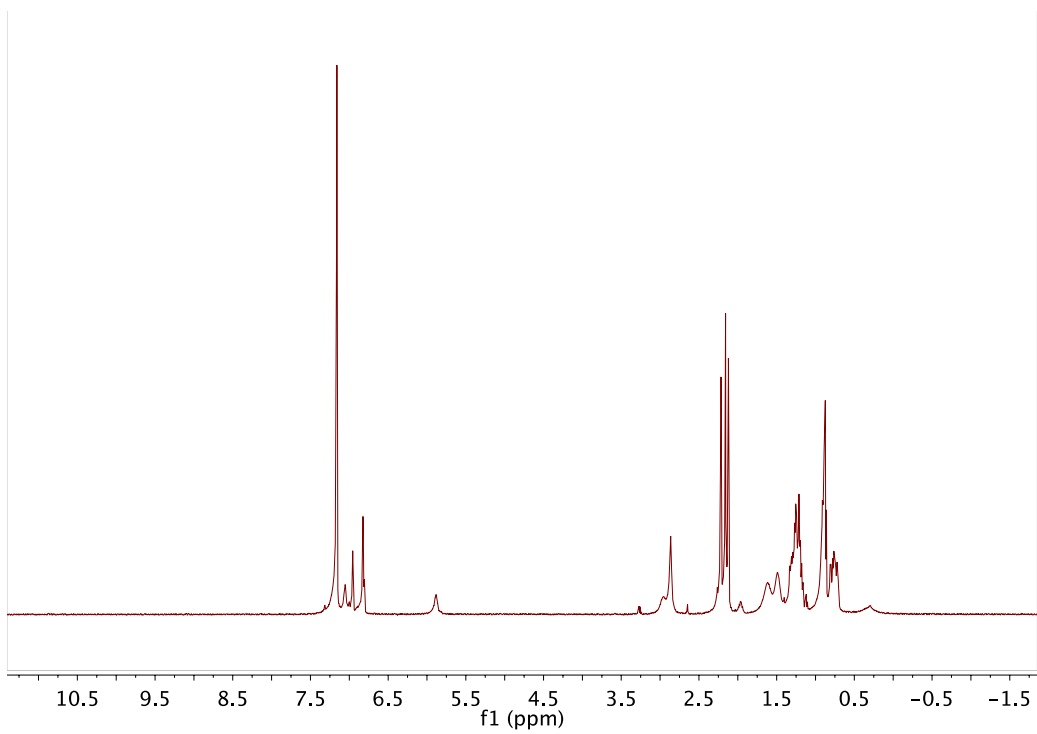

**Figure S9:**  $^1\text{H}$  NMR Spectrum of **5** in  $\text{C}_6\text{D}_6$ , 400 MHz, 300K

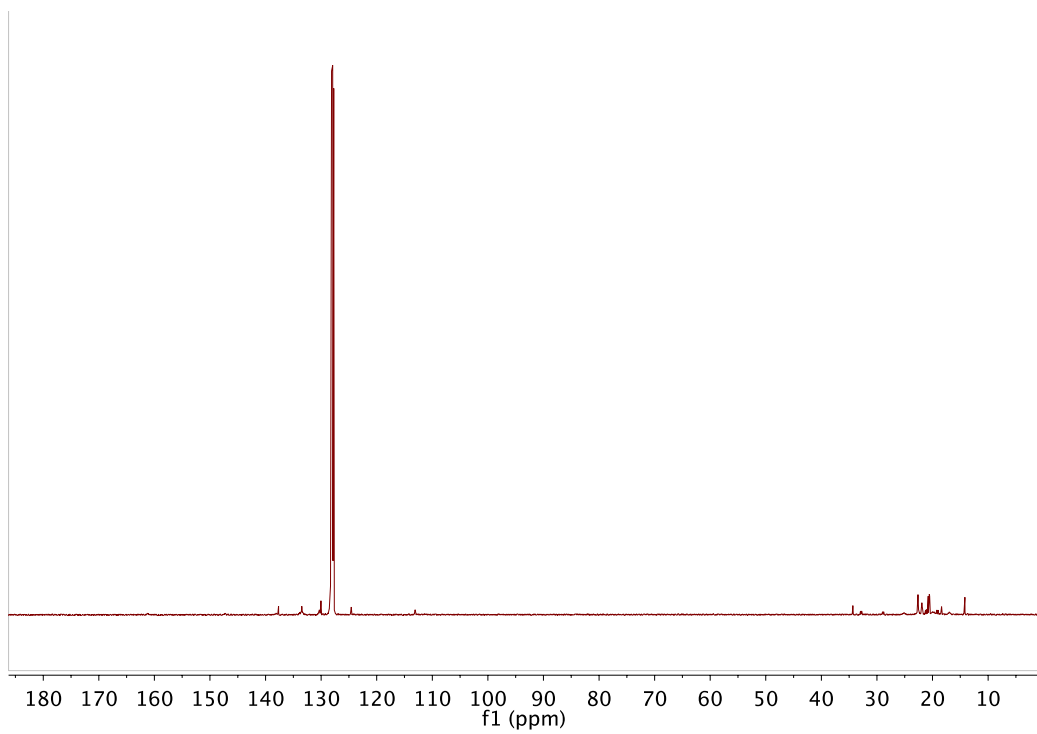

**Figure S10:**  $^{13}\text{C}\{^1\text{H}\}$  NMR Spectrum of **5** in  $\text{C}_6\text{D}_6$ , 125.8 MHz, 300K

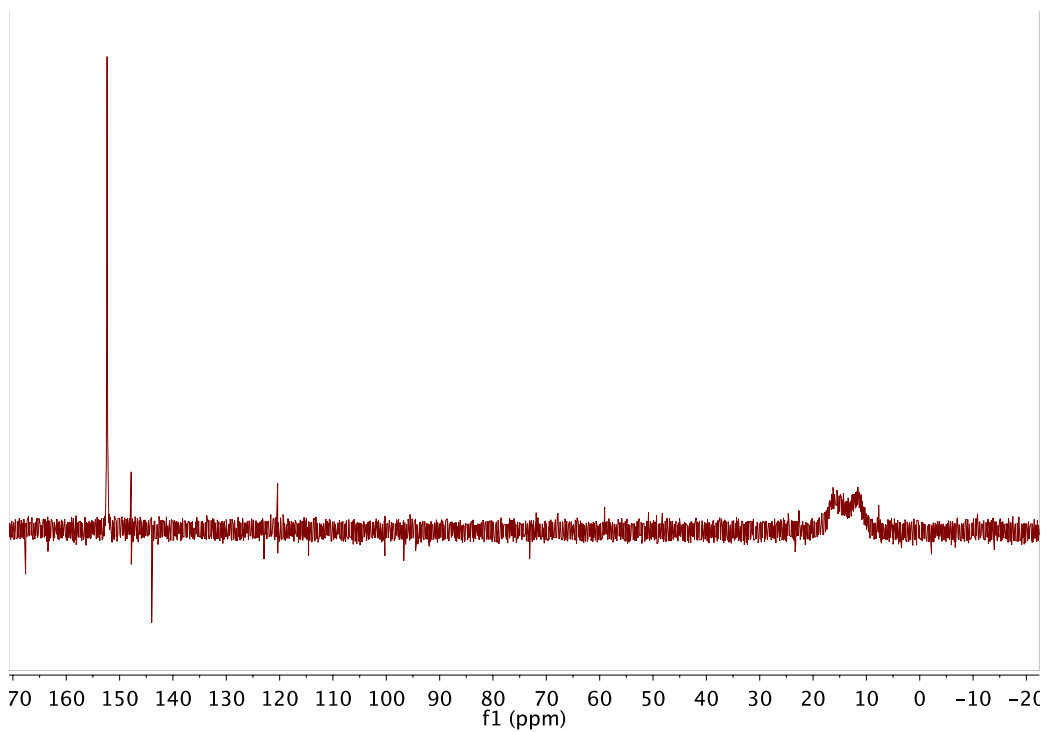

**Figure S11:**  $^{31}\text{P}\{^1\text{H}\}$  NMR Spectrum of **5** in  $\text{C}_6\text{D}_6$ , 162 MHz, 300K

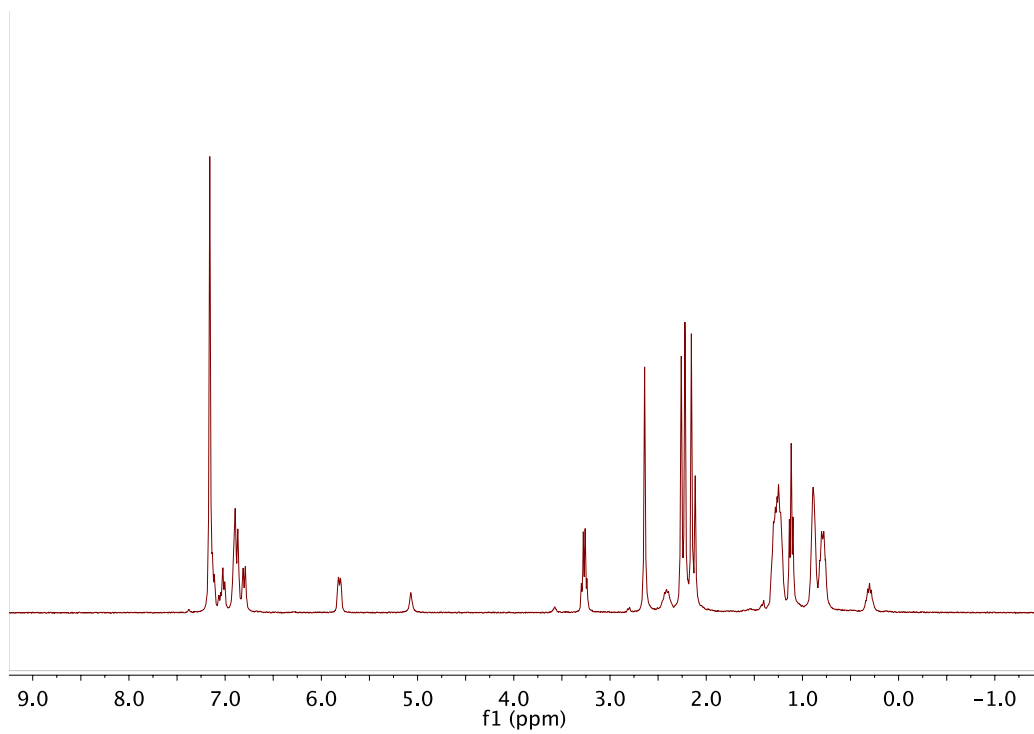

**Figure S12:**  $^1\text{H}$  NMR Spectrum of **7** in  $\text{C}_6\text{D}_6$ , 400 MHz, 300K

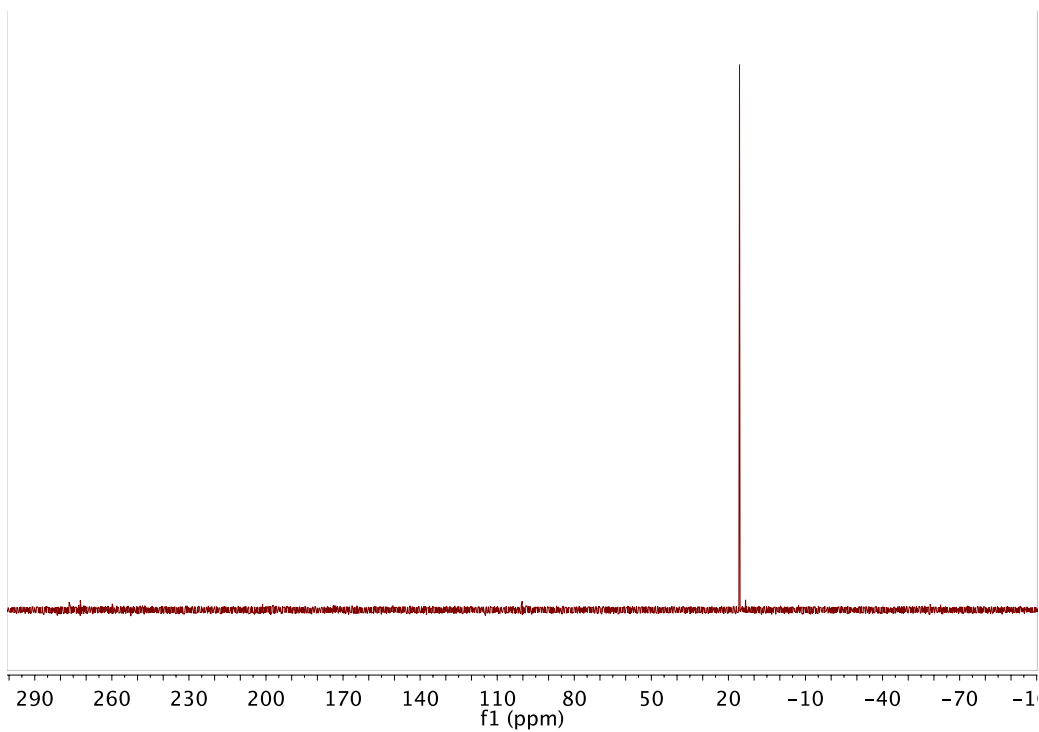

**Figure S13:**  $^{31}\text{P}\{^1\text{H}\}$  NMR Spectrum of **7** in  $\text{C}_6\text{D}_6$ , 162 MHz, 300K

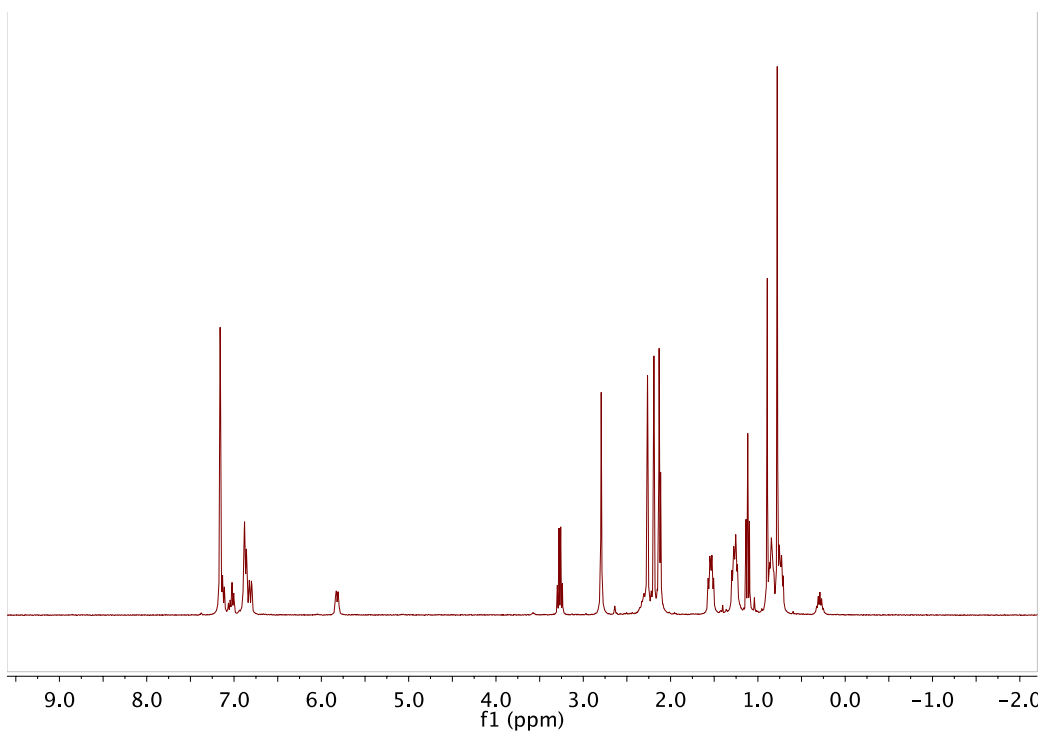

**Figure S14:**  $^1\text{H}$  NMR Spectrum of **8** in  $\text{C}_6\text{D}_6$ , 400 MHz, 300K



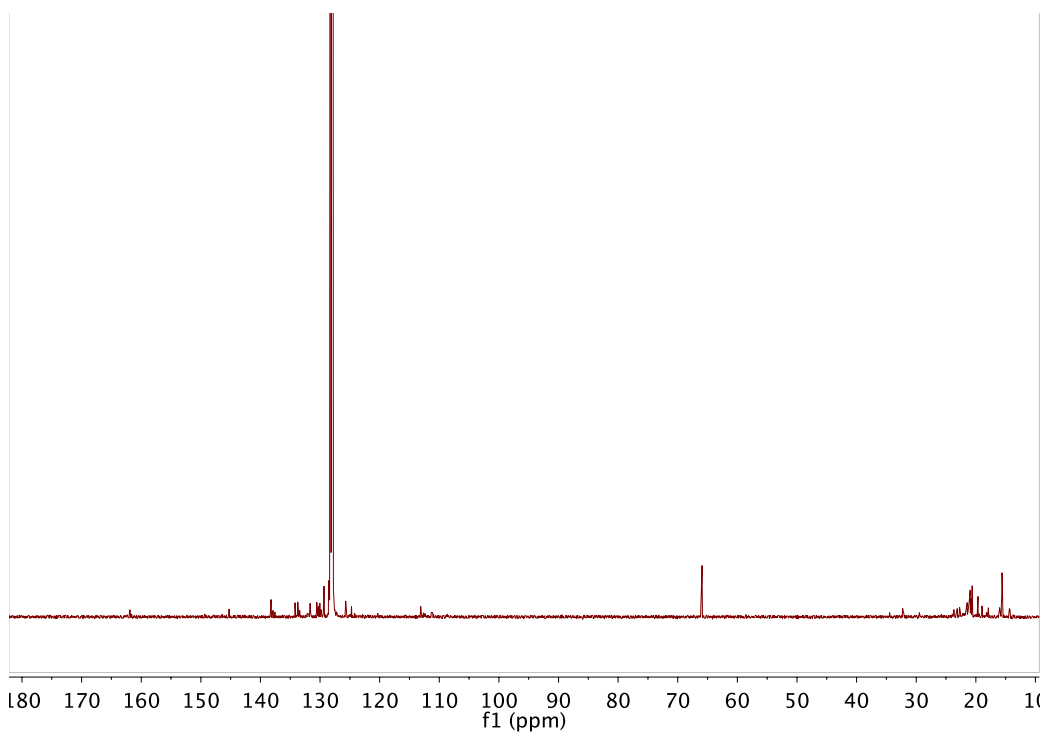

**Figure S15:**  $^{13}\text{C}\{^1\text{H}\}$  NMR Spectrum of **8** in  $\text{C}_6\text{D}_6$ , 125.8 MHz, 300K

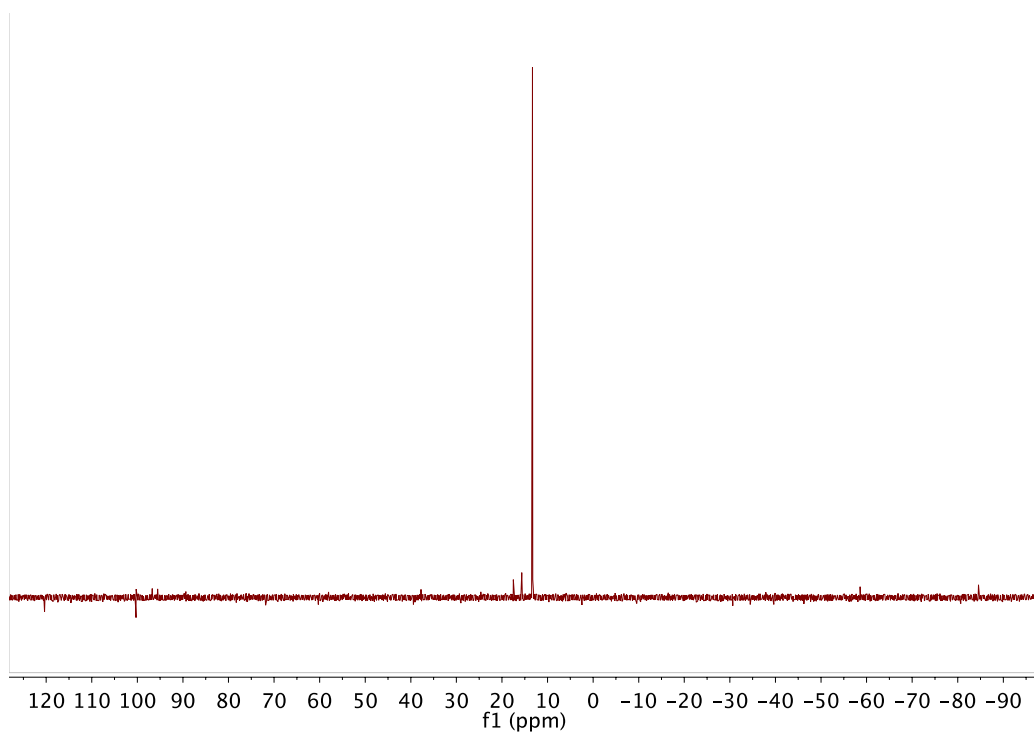

**Figure S16:**  $^{31}\text{P}\{^1\text{H}\}$  NMR Spectrum of **8** in  $\text{C}_6\text{D}_6$ , 162 MHz, 300K

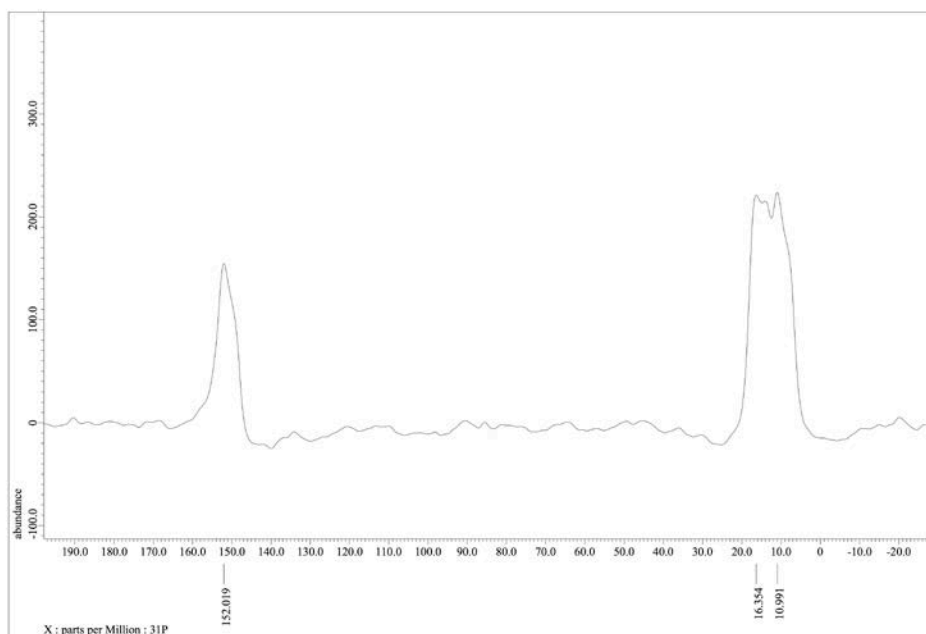

**Figure S17:**  $^{31}\text{P}$  NMR Spectrum of **5** in  $\text{C}_7\text{D}_8$ , 162 MHz, 265K

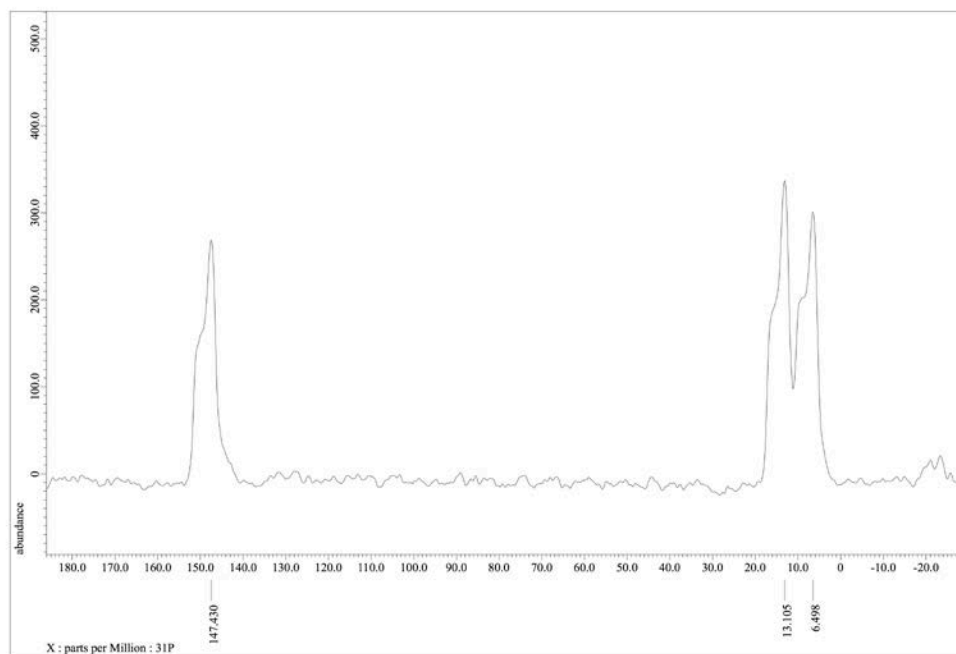

**Figure S18:**  $^{31}\text{P}$  NMR Spectrum of **5** in  $\text{C}_7\text{D}_8$ , 162 MHz, 219K

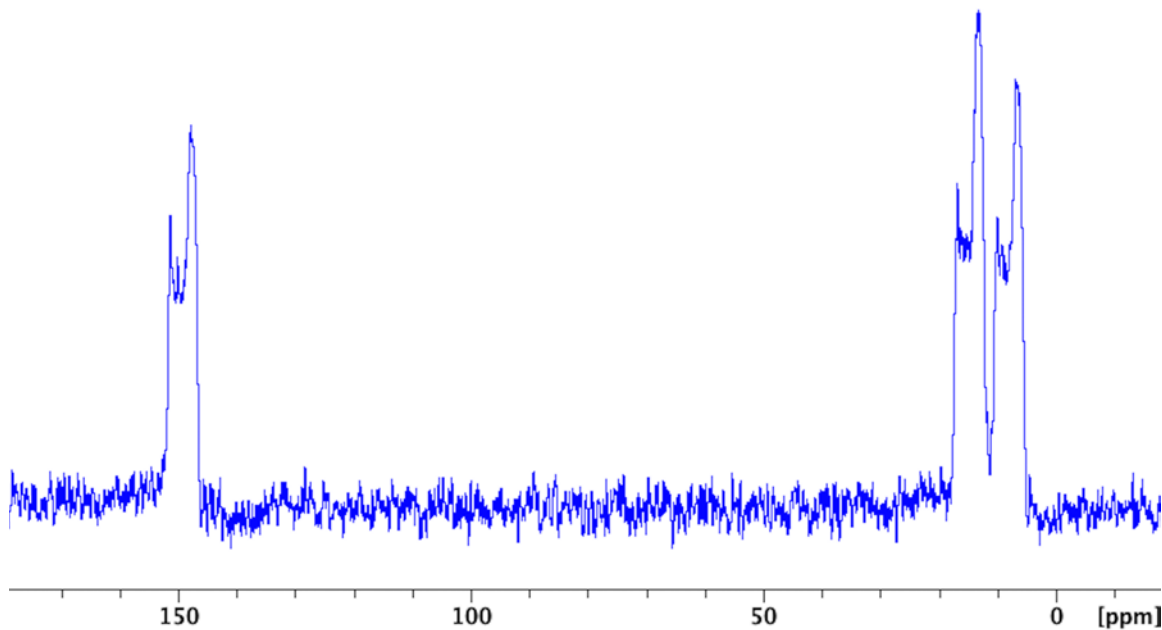

**Figure S19.**  $^{31}\text{P}\{^1\text{H}\}$  NMR spectrum of **5**, taken at 219 K in  $\text{C}_7\text{D}_8$ , 162 MHz.

**Computational Details.** All calculations were carried out using DFT as implemented in the ORCA program package<sup>1</sup>. Final geometry optimizations were performed using the BLYP<sup>2,3</sup> functional and the all-electron def2-TZVP(-f)-ZORA<sup>4</sup> basis set in combination with the auxiliary basis set def2-TZV/J<sup>5</sup>. To accelerate geometry optimizations we used the resolution of the identity,  $\text{R}^6$ , approximation. For these optimizations a tight convergence of the wavefunction was demanded on grid quality of Grid4 (also using SlowConv). The scalar relativistic zero'th order regular approximation (ZORA)<sup>7</sup> was employed to take into account relativistic effects whereas to dispersion was considered using Grimme's D3 method in all ORCA calculations. Our experience with the optimizations of the investigated extended molecules (~ 200 atoms) is that the convergence to the equilibrium structure is much faster when optimizing in Cartesian coordinates (COPT). Finally, the above-described final geometry optimizations were started from pre-optimized structures obtained via a lower level of theory (BLYP/def2-SV(P), def2-SVP/J, ZORA, RI, d3, LooseSCF, Grid3).

We used the NMR module of ADF2013<sup>8</sup> code to compute  $^{15}\text{N}$  NMR chemical shifts on the equilibrium structures obtained via the protocol described above. The functional employed consisted of the local density approximation of Vosko, Wilk, and Nusair (LDA VWN)<sup>9</sup> augmented with the nonlocal gradient correction PW91

from Perdew and Wang<sup>10</sup>. This functional has been shown to provide reliable chemical shift values even for heavy atom containing transition metal complexes<sup>11</sup>. The full electron basis set TZVP was utilized in these calculations and relativistic corrections were applied using ZORA. The computed isotropic shielding values of complexes were referenced to that of ammonia modeled in the same way.











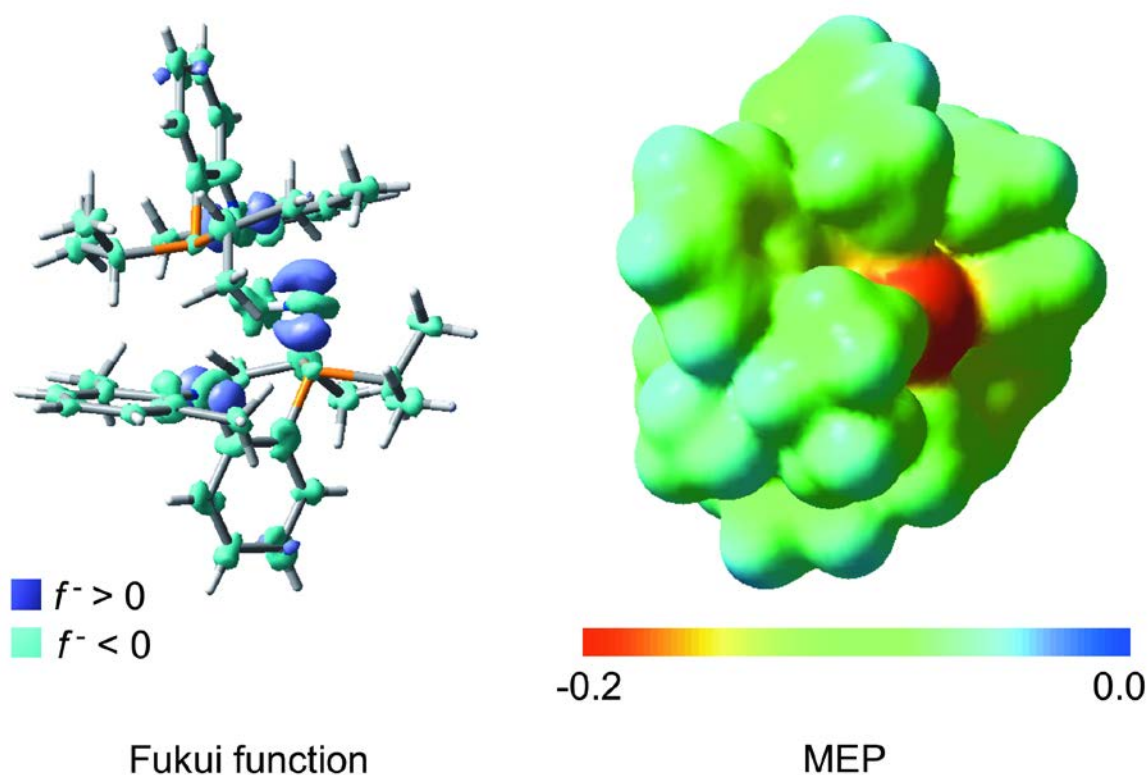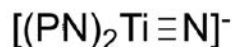

**Figure S19.** Nucleophilic Fukui function,  $f^-$ , and molecular electrostatic potential, MEP, for  $[(\text{PN})_2\text{Ti}\equiv\text{N}]^-$  characterizing soft (purple regions) and hard (red sites) electrophilic reactivity of the titanium-nitride functionality, respectively,.

**Crystallography Details.** Suitable single crystals for X-ray analysis of **2-8** were placed on the end of a Cryoloop coated in NVH oil. The X-ray intensity data collection was carried out on a Bruker APEXII CCD area detector using graphite-monochromated Mo-K $\alpha$  radiation ( $\lambda = 0.71073 \text{ \AA}$ ) at 100(1) K. Preliminary indexing was performed from a series of thirty-six  $0.5^\circ$  rotation frames with exposures of 10 seconds. Rotation frames were integrated using SAINT,<sup>12</sup> producing a listing of non-averaged  $F^2$  and  $\sigma(F^2)$  values which were then passed to the SHELXTL<sup>13</sup> program package for further processing and structure solution. The intensity data were corrected for Lorentz and polarization effects and for absorption using SADABS.<sup>14</sup> All calculations were performed using SHELXS<sup>15</sup> and SHELXL.<sup>16</sup> The structures were solved by Patterson and Fourier transform methods. All reflections were used during refinement. Non-hydrogen atoms were refined anisotropically and hydrogen atoms were refined using riding models with exception for **7**. For **4**, two crystallographically independent, but chemically equivalent molecules are present in the asymmetric unit. For **5**,  $^i\text{Pr}$  groups of  $\text{NP}^i\text{Pr}_2$  were disordered over two on the crystallographically special position. The thermal ellipsoids were fixed by SHELXL restraint commands,

DELU and SIMU. Disordered pentane molecule was located with 0.5 occupancies and a negative PART number, and refined with a rigid group model. For **6**, one site occupied by hexane was identified in the asymmetric unit. This site was considerably disordered and was treated by SQUEEZE as a diffuse contribution.<sup>17, 18</sup> In the resulting void space, a contribution of 134 e<sup>-</sup> per unit cell was found and taken to represent one hexane in the asymmetric unit, giving one pentane molecule for each Ti complex. For **7**, one site occupied by THF was identified in the asymmetric unit. This site was also treated by SQUEEZE as a diffuse contribution, resulting in a contribution of 186 e<sup>-</sup> per unit cell to give one THF molecule for each Ti complex. This data was treated as a two-component crystal data. One component with 0.8 occupancies was refined as a terminally bound parent imide complex **7**. The hydrogen atom of the imide ligand was located from the difference map and refined isotropically. The second component was considerably an insertion product in which the imide ligand has inserted into the arm of the PN ligand. The phosphorus atom and corresponding <sup>i</sup>Pr groups were refined with 0.2 occupancies, but the hydrogen atom corresponding to the parent imide hydrogen in **7** could not be located from the difference map due to its low occupancy. These results were checked using the IUCR's CheckCIF routine. The alerts in the output are related to the disordered groups and crystal solvents.

**Solid state <sup>15</sup>N NMR Details.** Solid-state <sup>15</sup>N NMR spectra were recorded under the cross polarization (CP) magic-angle spinning (MAS) condition on a Bruker Avance-600 NMR spectrometer (14.1 T) operating at the <sup>1</sup>H and <sup>15</sup>N Larmor frequencies of 600.17 and 60.81 MHz, respectively. The Hartmann-Hahn matching condition was established with a solid <sup>15</sup>NH<sub>4</sub>NO<sub>3</sub> sample. High-power <sup>1</sup>H decoupling (70 kHz) was applied during data acquisition. A 4-mm Bruker MAS probe was used with sample spinning frequencies between 5.0 and 14.5 kHz. A relaxation delay of 2 s and a contact time of 2 ms for CP were used. Powder samples were packed into a ZrO<sub>2</sub> rotor (4-mm o.d.) in a glove box. All <sup>15</sup>N chemical shifts were referenced to that of NH<sub>3</sub>(liq) ( $\delta = 0$  ppm) by using solid <sup>15</sup>NH<sub>4</sub>NO<sub>3</sub> as a secondary <sup>15</sup>N chemical shift reference ( $\delta = 23.8$  ppm). Spectral simulations were performed using DMFit.<sup>19</sup>

## References

- 1 F. Neese, ORCA—An ab initio, Density Functional and Semiempirical Program Package Version 3.0.1 (2013)
- 2 A. D. Becke, *Phys. Rev. A*, 1988, **38**, 3098.
- 3 C. T. Lee, W. T. Yang and R. G. Parr, *Phys. Rev. B*, 1988, **37**, 785.
- 4 D. A. Pantazis, X. Y. Chen, C. R. Landis and F. Neese, *J. Chem. Theory Comput.*, 2008, **4**, 908.
- 5 a) K. Eichkorn, F. Weigend, O. Treutler and R. Ahlrichs, *Theor. Chem. Acc.*, 1997, **97**, 119. b) K. Eichkorn, O. Treutler, H. Öhm, M. Häser and R. Ahlrichs, *Chem. Phys. Lett.*, 1995, **240**, 283.
- 6 K. Eichkorn, O. Treutler, H. Öhm, M. Häser and R. Ahlrichs, *Chem. Phys. Lett.*, 1995, **242**, 652.
- 7 a) E. van Lenthe, E. J. Baerends and J. G. Snijders, *J. Chem. Phys.*, 1993, **99**, 5648.; b) C. van Wullen, *J. Chem. Phys.*, 1998, **109**, 392.
- 8 E. J. Baerends, J. A., D. Bashford, A. Børces, F. M. Bickelhaupt, C. Bo, P. M. Boerrigter, L. Cavallo, D. P. Chong, L. Deng, R. M. Dickson, D. E. Ellis, M. van Faassen, M. Fan, T. H. Fischer, C. Fonseca Guerra, A. Ghysels, A. Giammona, S. J. A. van Gisbergen, A. W. Gotz, J. A. Groeneveld, O. V. Gritsenko, M. Grüning, F. E. Harris, P. Harris, P. van den Hoek, C. R. Jacob, H. Jacobsen, L. Jensen, G. van Kessel, F. Kootstra, M. V. Krykunov, E. van Lenthe, D. A. McCormack, A. Michalak, M. Mitoraj, J. Neugebauer, V. P. Nicu, L. Noodleman, V. P. O. Osinga, S. Patchkovskii, P. H. T. Philipsen, D. Post, C. C. Pye, W. Ravenek, J. I. Rodriguez, P. Ros, P. R. T. Schipper, G. Schreckenbach, M. Seth, J. G. Snijders, M. Solà, M. Swart, D. Swerhone, G. te Velde, P. Vernooijs, L. Versluis, L. Visscher, O. Visser, F. Wang, T. A. Wesolowski, E. M. van Wezenbeek, G. Wiesenekker, S. K. Wolff, T. K. Woo, A. L. Yakovlev and T. Ziegler, V. U. *ADF2013.01*, Amsterdam (The Netherlands).
- 9 S. H. Vosko, L. Wilk, Nusair, M. *Can. J. Phys.* 1980, **58**, 1200.
- 10 J. P. Perdew, J. A. Chevary, S. H. Vosko, K. A. Jackson, M. R. Pederson, D. J. Singh and C. Fiolhais, *Phys. Rev. B*, 1992, **46**, 6671.
- 11 M. Krykunov, T. Ziegler, E. van Lenthe, *J. Phys. Chem. A*, 2009, **113**, 11495 and references therein.
- 12 *SAINTE*; Bruker AXS Inc.: Madison, WI, USA. 2009.
- 13 *SHELXTL*; Bruker AXS Inc.: Madison, WI, USA, 2009.
- 14 G. M. Sheldrick, *SADABS*; University of Gottingen: Germany, 2007.
- 15 G. M. Sheldrick, *Acta Crystallogr.* 2008, **A64**, 112.
- 16  $R_1 = \Sigma ||F_o| - |F_c|| / \Sigma |F_o|$ ,  $wR_2 = [\Sigma w(F_o^2 - F_c^2)^2 / \Sigma w(F_o^2)^2]^{1/2}$ ,  $GOF = [\Sigma w(F_o^2 - F_c^2)^2 / (n - p)]^{1/2}$ ; where n = the number of reflections and p = the number of

---

parameters refined.

17 A. L. Spek, *Acta Crystallogr.* 2009, **D65**, 148.

18 P. van der Sluis and A. L. Spek, *Acta Crystallogr.* 1990, **A46**, 194.

19 D. Massiot, F. Fayon, M. Capron, I. King, S. Le Calvé, B. Alonso, J.-O. Durand, B. Bujoli, Z. Gan, G. Hoatson, Modelling one- and two-dimensional solid-state NMR spectra. *Magn. Reson. Chem.*, 2002, **40**, 70-76.
